# Supplementary material for: A phase 1, first-in-human study of 18F-GP1 positron emission tomography for imaging acute arterial thrombosis
Source: PubMed Central journal article supplement (PMC6323046; doi:10.1186/s13550-018-0471-8), 2019-01-07
Supplement: 13550_2018_471_MOESM1_ESM.pdf [file 13550_2018_471_MOESM1_ESM.pdf]

**A phase 1, first-in-human study of <sup>18</sup>F-GP1 positron emission tomography for imaging acute arterial thrombosis**

*EJNMMI Research*

Sun Young Chae<sup>1\*</sup>, Tae-Won Kwon<sup>2\*</sup>, Soyoung Jin<sup>3\*</sup>, Sun U Kwon<sup>4</sup>, Changhwan Sung<sup>1</sup>, Seung Jun Oh<sup>1</sup>, Sang Ju Lee<sup>1</sup>, Jungsu S. Oh<sup>1</sup>, Youngjin Han<sup>2</sup>, Yong-Pil Cho<sup>2</sup>, Narae Lee<sup>5</sup>, Ji Young Kim<sup>6</sup>, Norman Koglin<sup>7</sup>, Mathias Berndt<sup>7</sup>, Andrew W. Stephens<sup>7</sup>, Dae Hyuk Moon<sup>1</sup>

<sup>1</sup>Department of Nuclear Medicine, Asan Medical Center, University of Ulsan College of Medicine, Seoul, Republic of Korea,

<sup>2</sup>Department of Vascular Surgery, Asan Medical Center, University of Ulsan College of Medicine, Seoul, Republic of Korea,

<sup>3</sup>Department of Nuclear Medicine, Nowon Eulji Medical Center, Eulji University, Seoul, Republic of Korea,

<sup>4</sup>Department of Neurology, Asan Medical Center, University of Ulsan College of Medicine, Seoul, Republic of Korea,

<sup>5</sup>Department of Nuclear Medicine, Wonju Severance Christian Hospital, Yonsei University Wonju College of Medicine, Wonju, Republic of Korea,

<sup>6</sup>Department of Nuclear Medicine, Guri Hospital of Hanyang University Medical Center, Hanyang University College of Medicine, Guri, Republic of Korea,

<sup>7</sup>Life Molecular Imaging GmbH (formerly Piramal Imaging GmbH), Berlin, Germany

**Corresponding author:** Dae Hyuk Moon, Department of Nuclear Medicine, Asan Medical Center, University of Ulsan College of Medicine, 88, Olympic-ro 43-gil, Songpa-gu, Seoul 05505, Republic of Korea. Tel: 82-2-3010-4592, Fax: 82-2-3010-4588, E-mail: dhmoon@amc.seoul.kr

**Table S1.** Clinical laboratory parameters for safety assessment

| Categories      | Parameters                                                                                                                                                                                        |
|-----------------|---------------------------------------------------------------------------------------------------------------------------------------------------------------------------------------------------|
| Hematology      | Erythrocytes, leukocytes, hemoglobin, hematocrit, platelets                                                                                                                                       |
| Clotting time   | Prothrombin time, reagent-independent prothrombin ratio (INR, international normalised ratio), activated partial thromboplastin time                                                              |
| Serum chemistry | Glutamate pyruvate transaminase, glutamate oxaloacetate transaminase, alkaline phosphatase, total bilirubin, creatinine, chloride, potassium, sodium, total protein, blood urea nitrogen, albumin |
| Urine analysis  | pH-value, erythrocytes, leukocytes, nitrite, protein, bilirubin                                                                                                                                   |

**Table S2.** <sup>18</sup>F-GP1 uptake over time

| Time,<br>min <sup>a</sup> | SUVmean value <sup>b</sup> |                 |                 |               |                |
|---------------------------|----------------------------|-----------------|-----------------|---------------|----------------|
|                           | AAT foci                   | Spleen          | Kidney          | Liver         | Blood pool     |
| 0                         | 6.3 (4.2–9.8)              | 10.2 (8.7–11.0) | 12.3 (7.2–15.1) | 1.3 (1.2–1.5) | 9.8 (9.0–10.8) |
| 3                         | 5.7 (3.9–6.9)              | 10.0 (8.5–10.8) | 9.8 (7.1–11.8)  | 1.2 (1.2–1.4) | 5.3 (4.6–5.8)  |
| 7                         | 3.7 (3.0–4.6)              | 9.3 (8.1–9.7)   | 9.0 (6.7–10.3)  | 1.1 (1.0–1.3) | 4.1 (3.9–4.5)  |
| 15                        | 3.5 (2.7–4.4)              | 8.3 (7.7–9.3)   | 8.4 (6.4–9.6)   | 1.0 (0.9–1.2) | 3.2 (3.0–3.5)  |
| 23                        | 3.1 (2.5–3.8)              | 7.3 (6.1–8.4)   | 7.1 (5.6–8.3)   | 0.8 (0.5–1.0) | 2.7 (2.4–3.0)  |
| 60                        | 3.2 (2.3–4.5)              | 3.2 (2.7–4.2)   | 3.1 (2.5–3.9)   | 0.4 (0.2–0.6) | 2.0 (1.6–2.1)  |
| 120                       | 3.2 (2.6–4.3)              | 1.4 (0.9–1.9)   | 1.3 (0.8–1.7)   | 0.1 (0.0–0.4) | 1.5 (1.1–1.7)  |

<sup>a</sup>Time in minutes after <sup>18</sup>F-GP1 injection.

<sup>b</sup>Data are presented as median (interquartile range).

AAT, Acute arterial thrombosis; SUV, standardised uptake values.

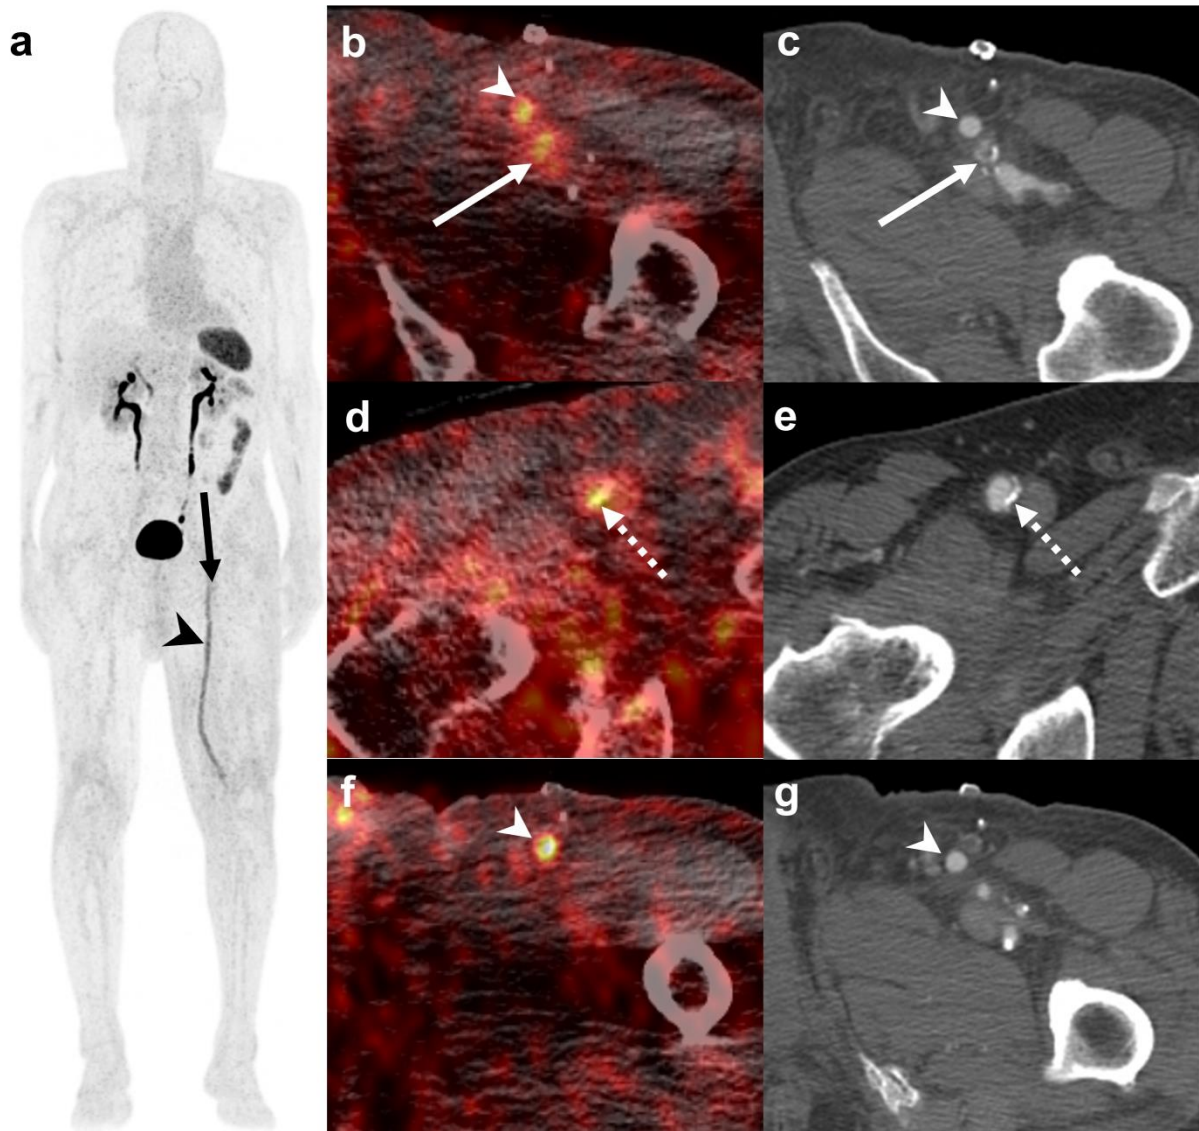

**Fig. S1  $^{18}\text{F}$ -GP1 PET/CT images of a 76-year-old man with bypass surgery and stent placement.** Anterior maximum intensity projection and transaxial images of  $^{18}\text{F}$ -GP1 PET/CT at 120 min after injection show a focal increased uptake in the left superficial femoral artery (a and b; arrows), which corresponds to the total occlusive lesion with calcified plaque (c). Additional positive  $^{18}\text{F}$ -GP1 uptakes are observed in the right common femoral artery with calcification (d and e; dotted arrows) and left femoral popliteal bypass graft (a, b, c, f and g; arrow heads), which was performed 3 days before  $^{18}\text{F}$ -GP1 PET/CT.
